# Supplementary material for: Rates of glycaemic deterioration in a real-world population with type 2 diabetes
Source: Springer Nature journal article supplement (doi:10.1007/s00125-017-4519-5), 2017-12-19

**ESM table 1: Drug effects for most commonly prescribed treatment(s) derived from linear mixed model**

| <b>Drug combination</b>       | <b>Estimate (95% CI)</b> | <b>N (total number of measures)</b> |
|-------------------------------|--------------------------|-------------------------------------|
| Untreated                     | REF                      | 33,243 (27.2%)                      |
| <b>MONOTHERAPY:</b>           |                          |                                     |
| <i>Metformin:</i>             |                          |                                     |
| <1g                           | -0.8 (-1.3, -0.4)        | 1961(1.6%)                          |
| ≥1g - <2g                     | -2.8 (-3.0, -2.5)        | 21317(17.5%)                        |
| ≥2g                           | -4.2 (-4.6, -3.9)        | 10288(8.4%)                         |
| SU                            | -3.4 (-3.7, -3.2)        | 15781(12.9%)                        |
| TZD                           | -7.4 (-8.3, -6.5)        | 695(0.6%)                           |
| <b>DUAL THERAPY:</b>          |                          |                                     |
| <i>Metformin + SU:</i>        |                          |                                     |
| <1g                           | -4.5 (-5.2, -3.8)        | 781(0.6%)                           |
| ≥1g - <2g                     | -6.7 (-7.0, -6.3)        | 8729(7.2%)                          |
| ≥2g                           | -9.2 (-9.5, -8.8)        | 11344(9.3%)                         |
| <i>Metformin + TZD:</i>       |                          |                                     |
| ≥1g - <2g                     | -8.2 (-9.0, -7.5)        | 1190(1.0%)                          |
| ≥2g                           | -8.9 (-9.5, -8.4)        | 2505(2.1%)                          |
| SU + TZD                      | -9.9 (-10.5, -9.3)       | 2045(1.7%)                          |
| ≥2g Metformin + DPP4          | -7.0 (-7.8, -6.2)        | 1099(0.9%)                          |
| <b>TRIPLE THERAPY:</b>        |                          |                                     |
| <i>Metformin + SU + TZD:</i>  |                          |                                     |
| ≥1g - <2g                     | -13.7 (-14.4, -12.9)     | 935(0.8%)                           |
| ≥2g                           | -16.5 (-17.1, -16.0)     | 3063(2.5%)                          |
| <i>Metformin + SU + DPP4:</i> |                          |                                     |
| ≥1g - <2g                     | -11.6 (-12.6, -10.7)     | 593(0.5%)                           |
| ≥2g                           | -14.3 (-14.9, -13.7)     | 2155(1.8%)                          |
| ≥2g Metformin + SU + GLP1:    | -17.3 (-18.3, -16.3)     | 699(0.6%)                           |

*SU: Sulphonylureas; TZD: Thiazolidinediones; DPP4: Dipeptidyl Peptidase-4 Inhibitors. GLP1: glucagon-like peptide agonists. The coefficient presented in the table is the effect of the drug(s) on HbA<sub>1c</sub> characterised in mmol/mol units, with untreated measures as the reference group.*

ESM Fig. 1: Study population derivation

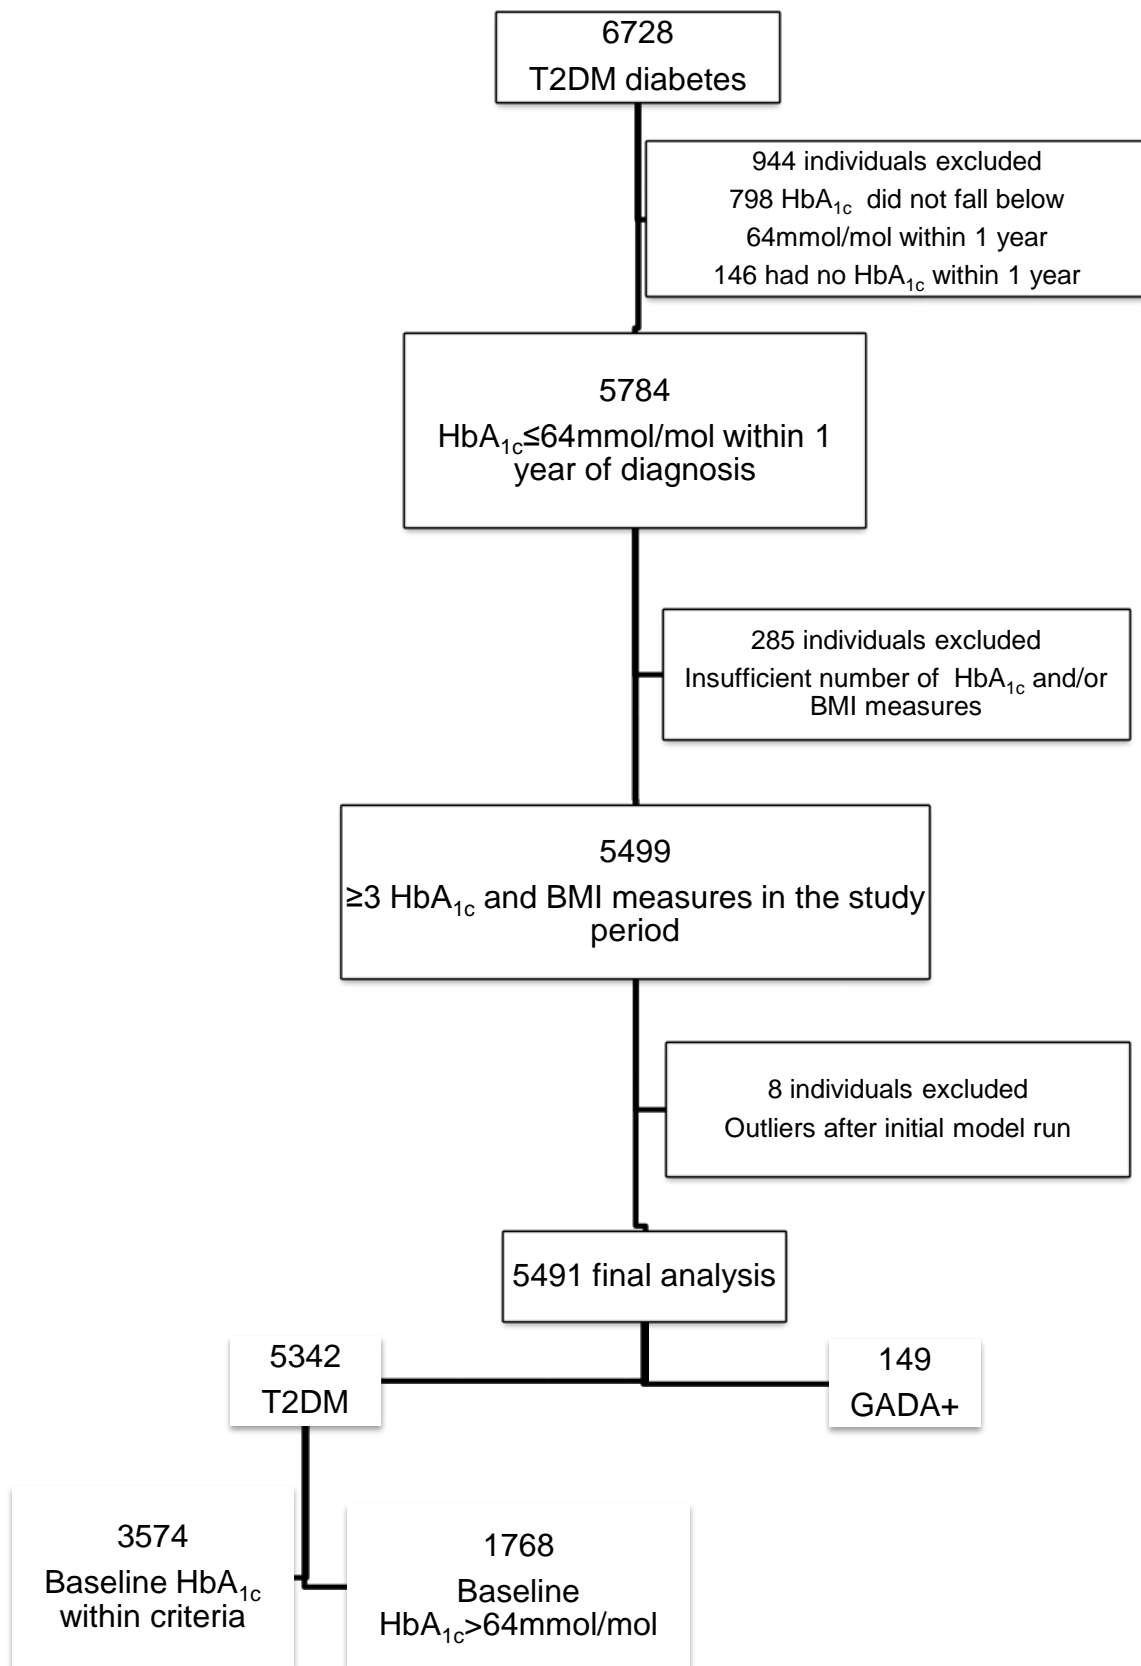

Supplement: MOESM1 [file 15319250]
